# Supplementary material for: Positionality of Community Health Workers on Health Intervention Research Teams: A Scoping Review
Source: Front Public Health. 2020 Jun 16;8:208. doi: 10.3389/fpubh.2020.00208 (PMC7308474; doi:10.3389/fpubh.2020.00208)
Supplement: Data Sheet 1 — Data extraction table for primary analysis articles to account for some spelling errors, more accurate listings of some of the target populations of the intervention studies, and accuracy in dates of publication. [file Data_Sheet_1.xlsx]

## Sheet: Data Extraction Table
					CHW INVOLVEMENT IN RESEARCH PHASES
Author	Intervention Focus	CHW Term (i.e. promotora, lay health advisor, etc.)	CBPR?	Target Population	Research Question (identifying the issue)	Intervention Design	Instrumentation and Measurement Design	Eligibility & Recruitment	Intervention Implementation	Data Collection	Data Analysis	Interpretation of Results	Dissemination/Action	Total Roles	Randomized-Control Trial?	Core Competencies	Full Citation
Adair et al., 2012	Chronic disease	care guides	0	Adults with hypertension, diabetes, and/or heart failure	0	0	0	0	1	1	0	0	0	2	0	Trained but not in core competencies	Adair R, Christianson J, Wholey DR, White K, Town R, Lee S, Britt H, Lund P, Lukasewycz A, Elumba D. Care guides: employing nonclinical laypersons to help primary care teams manage chronic disease. J Ambul Care Manage (2012) 35(1):27-37. doi: 10.1097/JAC.0b013e31823b0fbe
Anderson-Reeves et al., 2017	Maternal & Child Health	CHW	0	Westside Healthy Start program participants and community members	0	0	0	1	1	1	0	0	0	3	0	Trained but not in core competencies	Anderson-Reeves T, Goodman J, Bragg B, Leruth C. House parties: an innovative model for outreach and community-based health education. Matern Child Health J (2017) 21(1):75-80. https://doi.org/10.1007/s10995-017-2378-9
Andrews et al., 2016	Substance Use	coaches	1	Women in subsidized housing	0	0	0	1	1	0	0	0	0	2	1	Trained but not in core competencies	Andrews JO, Mueller M, Dooley M, Newman SD, Magwood GS, Tingen MS. Effect of a smoking cessation intervention for women in subsidized neighborhoods: a randomized controlled trial. Prev Med (2016) 90:170-6. https://doi.org/10.1016/j.ypmed.2016.07.008
Araiza et al., 2012	Disease Prevention & Promotion	promotoras	0	Spanish-speaking Latino men and women	0	0	0	1	1	1	0	0	0	3	0	Trained but not in core competencies	Araiza C, Valenzuela M, Gance-Cleveland B. Salud con Sabor Latino: a culturally sensitive obesity prevention curriculum in an underserved Latino community. Int J Health Promot Educ (2012) 50(2):51-60. https://doi.org/10.1080/14635240.2012.661963
Arcury et al., 2009	Environmental & Occupational Health	promotoras	1	Latina women in farmworker families	0	0	0	1	1	0	0	0	0	2	0	Information on training not provided	Arcury TA, Marín A, Snively BM, Hernández-Pelletier M, Quandt SA. Reducing farmworker residential pesticide exposure: evaluation of a lay health advisor intervention. Health Promot Pract (2009) 10(3):447-55. https://doi.org/10.1177/1524839907301409
Ard et al., 2017	Disease Prevention & Promotion	community health advisors	1	Overweight/obese African-American women	0	0	0	1	1	1	0	0	0	3	1	Trained but not in core competencies	Ard JD, Carson TL, Shikany JM, Li Y, Hardy CM, Robinson JC, Williams AG, Baskin ML. Weight loss and improved metabolic outcomes amongst rural African American women in the Deep South: six‐month outcomes from a community‐based randomized trial. J Intern Med (2017) 282(1):102-113. https://doi.org/10.1111/joim.12622
Arredondo et al., 2013	Disease Prevention & Promotion	promotoras	1	U.S.-Mexico border region community	1	1	1	1	1	1	1	1	1	9	0	Experienced CHWs	Arredondo E, Mueller K, Mejia E, Rovira-Oswalder T, Richardson D, Hoos T. Advocating for environmental changes to increase access to parks: engaging promotoras and youth leaders. Health Promot Pract (2013) 14(5):759-766. https://doi.org/10.1177/1524839912473303
Balcázar et al., 2009	Disease Prevention & Promotion	promotoras	1	Hispanic adults	0	0	0	1	1	0	0	0	0	2	0	Trained but not in core competencies	Balcázar H, Alvarado M, Fulwood R, Pedregón V, Cantu F. A promotora de salud model for addressing cardiovascular disease risk factors in the US-Mexico border region. Prev Chronic Dis (2009) 6(1): A02.
Balcázar et al., 2009	Chronic disease	promotoras	1	Hypertensive Mexican-Americans	0	1	0	0	1	0	0	0	0	2	1	Experienced CHWs	Balcázar HG, Byrd TL, Ortiz M, Tondapu SR, Chavez M. A randomized community intervention to improve hypertension control among Mexican Americans: using the promotoras de salud community outreach model. J Health Care Poor Underserved (2009) 20(4):1079-94. https://doi.org/10.1353/hpu.0.0209
Balcázar et al., 2010	Disease Prevention & Promotion	promotoras	1	Hispanic adults with chronic disease risk factors	0	0	0	0	1	1	0	0	0	2	1	Trained but not in core competencies	Balcázar HG, de Heer H, Rosenthal L, Duarte MO, Aguirre M, Flores L, Puentes FA, Ortiz M, Cardenas VM, Schulz LO. A Promotores de Salud intervention to reduce cardiovascular disease risk in a high-risk Hispanic border population, 2005-2008. Prev Chronic Dis (2010) 7(2):A28.
Barbee et al., 2010	Disease Prevention & Promotion	CHW	1	Haitian immigrant women	0	0	0	1	1	1	0	0	0	3	0	Trained but not in core competencies	Barbee L, Kobetz E, Menard J, Cook N, Blanco J, Barton B, Auguste P, McKenzie N. Assessing the acceptability of self-sampling for HPV among Haitian immigrant women: CBPR in action. Cancer Causes Control (2010) 21(3):421-31. https://doi.org/10.1007/s10552-009-9474-0
Blanks et al., 2016	Disease Prevention & Promotion	CHW	1	African American women	0	0	0	1	1	0	0	0	0	2	0	Trained but not in core competencies	Blanks SH, Treadwell H, Bazzell A, Graves W, Osaji O, Dean J, McLawhorn JT, Stroud JL. Community engaged lifestyle modification research: engaging diabetic and Prediabetic African American women in community-based interventions. J Obes (2016) 2016: 1-8. https://doi.org/10.1155/2016/3609289
Brown et al., 2018	Disease Prevention & Promotion	CHW	0	Low-income Hispanics	0	0	0	1	1	1	0	0	0	3	0	Information on training not provided	Brown LD, Vasquez D, Salinas JJ, Tang X, Balcázar H. Evaluation of healthy fit: A community health worker model to address Hispanic health disparities. Prev Chronic Dis (2018) 15: E49. https://doi.org/10.5888/pcd15.170347
Bush et al., 2014	Environmental & Occupational Health	promotoras	1	Latino forest workers	1	1	1	1	1	1	0	1	1	8	0	Trained in core competencies	Bush DE, Wilmsen C, Sasaki T, Barton‐Antonio D, Steege AL, Chang C. Evaluation of a pilot promotora program for Latino forest workers in southern Oregon. Am J Ind Med (2014) 57(7):788-99. https://doi.org/10.1002/ajim.22347
Castañeda et al., 2016	Disease Prevention & Promotion	promotoras	1	Spanish-speaking Latina women	0	0	0	0	1	1	0	0	0	2	0	Trained in core competencies	Castañeda SF, Giacinto RE, Medeiros EA, Brongiel I, Cardona O, Perez P, Talavera GA. Academic-community partnership to develop a patient-centered breast cancer risk reduction program for Latina primary care patients. J Racial Ethn Health Disparities (2016) 3(2):189-99. https://doi.org/10.1007/s40615-015-0125-8
Castillo et al., 2010	Chronic disease	CHW	0	Hispanics with type 2 diabetes	0	0	0	1	1	1	0	0	0	3	0	Trained but not in core competencies	Castillo A, Giachello A, Bates R, Concha J, Ramirez V, Sanchez C, Pinsker E, Arrom J. Community-based diabetes education for Latinos. Diabetes Educ (2010) 36(4):586-94. https://doi.org/10.1177/0145721710371524
Cene et al., 2008	Disease Prevention & Promotion	CHW	0	African Americans with premature coronary heart disease	0	0	0	0	1	0	0	0	0	1	1	Information on training not provided	Cene CW, Yanek LR, Moy TF, Levine DM, Becker LC, Becker DM. Sustainability of a multiple risk factor intervention on cardiovascular disease in high-risk African American families. Ethn Dis (2008) 18(2):169-75.
Chan et al., 2011	Disease Prevention & Promotion	promotores	0	Hispanic men	0	0	0	0	1	1	0	0	0	2	1	Information on training not provided	Chan EC, McFall SL, Byrd TL, Mullen PD, Volk RJ, Ureda J, Calderon-Mora J, Morales P, Valdes A, Bartholomew LK. A community-based intervention to promote informed decision making for prostate cancer screening among Hispanic American men changed knowledge and role preferences: a cluster RCT. Patient Educ Couns (2011) 84(2):e44-51. https://doi.org/10.1016/j.pec.2010.07.033
Cherrington et al., 2015	Disease Prevention & Promotion	promotoras	1	Latina immigrants	0	1	0	0	1	0	0	0	0	2	0	Trained but not in core competencies	Cherrington AL, Willig AL, Agne AA, Fowler MC, Dutton GR, Scarinci IC. Development of a theory-based, peer support intervention to promote weight loss among Latina immigrants. BMC Obes (2015)2:17. https://doi.org/10.1186/s40608-015-0047-3
Chinn et al., 2013	Maternal & Child Health	CHW	0	Latina mothers and young children	0	1	0	0	1	1	0	1	0	4	0	Experienced CHWs	Chinn DC, Levine MJ, Matos MS, Findley DS, Edelstein DB. An interprofessional collaborative approach in the development of a caries risk assessment mobile tablet application: My Smile Buddy. J Health Care Poor Underserved (2013) 24(3):1010-20. https://doi.org/10.1353/hpu.2013.0114
Christopher et al., 2008	Disease Prevention & Promotion	lay health advisers	1	Apsáalooke women	0	0	0	0	1	0	0	0	0	1	0	Trained but not in core competencies	Christopher S, Gidley AL, Letiecq B, Smith A, McCormick AK. A cervical cancer community-based participatory research project in a Native American community. Health Educ Behav(2008) 35(6):821-34. https://doi.org/10.1177/1090198107309457
Chung et al., 2015	Disease Prevention & Promotion	lay health workers	0	Hispanics/Latinos in Northern San Diego	0	0	0	1	1	1	0	0	0	3	0	Trained but not in core competencies	Chung GY, Brown G, Gibson D. Increasing melanoma screening among Hispanic/Latino Americans: a community-based educational intervention. Health Educ Behav (2015) 42(5):627-32. https://doi.org/10.1177/1090198115578748
Collinsworth et al., 2013	Chronic disease	CHW	0	Adults with Type 2 diabetes	0	0	0	0	1	1	0	0	0	2	0	Experienced CHWs	Collinsworth AW, Vulimiri M, Schmidt KL, Snead CA. Effectiveness of a community health worker–led diabetes self-management education program and implications for CHW involvement in care coordination strategies. Diabetes Educ (2013) 39(6):792-9. https://doi.org/10.1177/0145721713504470
Cooper et al., 2011	Chronic disease	CHW	0	Low income individuals with hypertension	0	0	0	0	1	0	0	0	0	1	1	Information on training not provided	Cooper LA, Roter DL, Carson KA, Bone LR, Larson SM, Miller ER, Barr MS, Levine DM. A randomized trial to improve patient-centered care and hypertension control in underserved primary care patients. J Intern Med (2011) 26(11):1297-304. https://doi.org/10.1007/s11606-011-1794-6
Coronado et al., 2016	Disease Prevention & Promotion	promotoras	0	Latina women	0	0	0	0	1	0	0	0	0	1	1	Trained but not in core competencies	Coronado GD, Beresford SA, McLerran D, Jimenez R, Patrick DL, Bishop S, Scheel JR, Thompson B. Multilevel intervention raises Latina participation in mammography screening: findings from¡ Fortaleza Latina! Cancer Epidemiol Biomarkers Prev (2016) 25(4): 584-92. https://doi.org/10.1158/1055-9965.epi-15-1246
Cramer et al., 2018	Maternal & Child Health	CHW	1	Rural pregnant women	0	1	1	1	1	1	0	0	0	5	0	Experienced CHWs	Cramer ME, Mollard EK, Ford AL, Kupzyk KA, Wilson FA. The feasibility and promise of mobile technology with community health worker reinforcement to reduce rural preterm birth. Public Health Nurs (2018) 35(6):508-16. https://doi.org/10.1111/phn.12543
Crespo et al., 2012	Disease Prevention & Promotion	promotora/community health advisor	0	Latino children	0	1	0	1	1	0	0	0	1	4	1	Trained in core competencies	Crespo NC, Elder JP, Ayala GX, Slymen DJ, Campbell NR, Sallis JF, McKenzie TL, Baquero B, Arredondo EM. Results of a multi-level intervention to prevent and control childhood obesity among Latino children: the Aventuras Para Niños Study. Ann Behav Med (2012) 43(1):84-100. https://doi.org/10.1007/s12160-011-9332-7
D'Alonzo et al., 2018	Disease Prevention & Promotion	promotoras	1	Latina women	0	0	0	1	1	1	0	0	0	3	0	Information on training not provided	D’Alonzo KT, Smith BA, Dicker LH. Outcomes of a culturally tailored partially randomized patient preference controlled trial to increase physical activity among low-income immigrant Latinas. J Transcult Nurs (2018) 29(4):335-45. https://doi.org/10.1177/1043659617723073
deRossett et al., 2014	Maternal & Child Health	promotoras	0	Hispanic women	0	0	0	1	1	1	0	0	0	3	0	Experienced CHWs	deRosset L, Mullenix A, Flores A, Mattia-Dewey D, Mai CT. Promotora de salud: promoting folic acid use among Hispanic women. J Womens Health (2014) 23(6):525-31. https://doi.org/10.1089/jwh.2013.4695
DePue et al., 2013	Chronic disease	CHW	0	Samoans with type 2 diabetes	0	0	0	0	1	0	0	0	0	1	1	Trained but not in core competencies	DePue JD, Dunsiger S, Seiden AD, Blume J, Rosen RK, Goldstein MG, Nu'usolia O, Tuitele J, McGarvey ST. Nurse–community health worker team improves diabetes care in American Samoa: results of a randomized controlled trial. Diabetes Care (2013) 36(7):1947-53. https://doi.org/10.2337/dc12-1969
Eisenman et al., 2009	Environmental & Occupational Health	promotoras	1	Latinos in LA county	0	0	0	0	1	0	0	0	0	1	1	Experienced CHWs	Eisenman DP, Glik D, Gonzalez L, Maranon R, Zhou Q, Tseng CH, Asch SM. Improving Latino disaster preparedness using social networks. Am J Prev Med (2009) 37(6):512-7. https://doi.org/10.1016/j.amepre.2009.07.022
Ell et al., 2017	Chronic disease	promotoras	0	Latino patients with diabetes or heart disease	0	0	0	0	0	1	0	0	0	1	1	Experienced CHWs	Ell K, Aranda MP, Wu S, Oh H, Lee PJ, Guterman J. Promotora assisted depression and self-care management among predominantly Latinos with concurrent chronic illness: safety net care system clinical trial results. Contemp Clin Trials (2017) 61:1-9. https://doi.org/10.1016/j.cct.2017.07.001
Faucher et al., 2010	Disease Prevention & Promotion	promotoras	1	Low-income Mexican American women	0	0	0	0	1	0	0	1	0	2	1	Trained but not in core competencies	Faucher MA, Mobley J. A community intervention on portion control aimed at weight loss in low‐income Mexican American women. J Midwifery Womens Health (2010) 55(1):60-4. https://doi.org/10.1016/j.jmwh.2009.03.014
Feltner et al., 2012	Disease Prevention & Promotion	CHW	0	Medically underserved of Appalachian Kentucky	0	0	0	0	1	0	0	0	0	1	0	Trained in core competencies	Feltner FJ, Ely GE, Whitler ET, Gross D, Dignan M. Effectiveness of community health workers in providing outreach and education for colorectal cancer screening in Appalachian Kentucky. Soc Work Health Care (2012) 51(5):430-40. https://doi.org/10.1080/00981389.2012.657296
Fernàndez et al., 2009	Disease Prevention & Promotion	lay health workers/promotoras	1	Low-income Hispanic women	0	0	0	0	1	0	0	0	0	1	1	Experienced CHWs	Fernández ME, Gonzales A, Tortolero-Luna G, Williams J, Saavedra-Embesi M, Chan W, Vernon SW. Effectiveness of Cultivando la Salud: a breast and cervical cancer screening promotion program for low-income Hispanic women. Am J Public Health (2009) 99(5):936-43. https://doi.org/10.2105/ajph.2008.136713
Findley et al., 2009	Disease Prevention & Promotion	CHW	1	Children less than 5 in Manhattan	0	0	0	1	1	0	0	0	0	2	0	Experienced CHWs	Findley SE, Sanchez M, Mejia M, Ferreira R, Pena O, Matos S, Stockwell MS, Irigoyen M. Effective strategies for integrating immunization promotion into community programs. Health Promot Pract (2009) 10(2 Suppl):128S-37S. https://doi.org/10.1177/1524839909331544
Forster-Cox et al., 2010	Environmental & Occupational Health	promotoras	0	Families in the US-Mexico border region	0	0	0	1	1	1	0	0	0	3	0	Experienced CHWs	Forster-Cox SC, Mangadu T, Jacquez B, Fullerton L. The environmental health/home safety education project: a successful and practical US-Mexico border initiative. Health Promot Pract (2010) 11(3):325-31. https://doi.org/10.1177/1524839909341026
Furman et al., 2016	Maternal & Child Health	CHW	1	African American mothers in Cleveland	1	1	0	1	1	1	0	0	0	5	0	Experienced CHWs	Furman L, Matthews L, Davis V, Killpack S, O'Riordan MA. Breast for success: a Community–Academic collaboration to increase breastfeeding among high-risk mothers in Cleveland. Prog Community Health Partnersh (2016) 10(3):341-53. https://doi.org/10.1353/cpr.2016.0041
Gielen et al., 2013	Environmental & Occupational Health	CHW	0	Low-income residents of Baltimore	0	0	0	1	0	0	0	0	0	1	1	Information on training not provided	Gielen AC, Shields W, Frattaroli S, McDonald E, Jones V, Bishai D, O'Brocki R, Perry EC, Bates-Hopkins B, Tracey P, Parsons S. Enhancing fire department home visiting programs: results of a community intervention trial. J Burn Care Res (2013) 34(4):e250-6. https://doi.org/10.1097/bcr.0b013e3182685b3a
Grzywacz et al., 2009	Environmental & Occupational Health	lay health promoters	1	Latino poultry-processing workers	0	0	0	1	1	0	0	0	0	2	0	Trained but not in core competencies	Grzywacz JG, Arcury TA, Marín A, Carrillo L, Coates ML, Quandt SA. Using lay health promoters in occupational health: outcome evaluation in a sample of Latino poultry-processing workers. New Solut (2009) 19(4):449-66. https://doi.org/10.2190/ns.19.4.e
Harvey et al., 2009	Disease Prevention & Promotion	CHW	1	African American and Latina women	1	1	1	1	1	1	0	0	0	6	0	Trained in core competencies	Harvey I, Schulz A, Israel B, Sand S, Myrie D, Lockett M, Weir S, Hill Y. The Healthy Connections project: a community-based participatory research project involving women at risk for diabetes and hypertension. Prog Community Health Partnersh (2009) 3(4):287-300. https://doi.org/10.1353/cpr.0.0088
Heisler et al., 2014	Chronic disease	CHW	1	Low-income Latino and African American adults with diabetes	0	1	0	0	1	0	0	0	0	2	1	Experienced CHWs	Heisler M, Choi H, Palmisano G, Mase R, Richardson C, Fagerlin A, Montori VM, Spencer M, An LC. Comparison of community health worker–led diabetes medication decision-making support for low-income Latino and African American adults with diabetes using e-health tools versus print materials: a randomized, controlled trial. Ann Intern Med (2014) 161(10_Supplement):S13-22. https://doi.org/10.7326/m13…
Heredia et al., 2017	Disease Prevention & Promotion	CHW	0	Hispanic adults in border communities	0	0	0	1	1	1	0	0	0	3	0	Trained but not in core competencies	Heredia NI, Lee M, Mitchell-Bennett L, Reininger BM. Tu Salud¡ Sí Cuenta! Your Health Matters! A Community-wide Campaign in a Hispanic Border Community in Texas. J Nutr Educ Behav (2017) 49(10):801-9. https://doi.org/10.1016/j.jneb.2017.06.008
Hoeft et al., 2016	Disease Prevention & Promotion	promotoras	0	Spanish-speaking moms and children	0	1	0	0	1	0	0	0	0	2	0	Experienced CHWs	Hoeft KS, Barker JC, Shiboski S, Pantoja‐Guzman E, Hiatt RA. Effectiveness evaluation of Contra Caries Oral Health Education Program for improving Spanish‐speaking parents’ preventive oral health knowledge and behaviors for their young children. Community Dent Oral Epidemiol (2016) 44(6):564-76. https://doi.org/10.1111/cdoe.12250
Holt et al., 2013	Disease Prevention & Promotion	community health advisors	0	African Americans	0	1	0	1	1	0	0	0	0	3	1	Trained but not in core competencies	Holt CL, Litaker MS, Scarinci IC, Debnam KJ, McDavid C, McNeal SF, Eloubeidi MA, Crowther M, Bolland J, Martin MY. Spiritually based intervention to increase colorectal cancer screening among African Americans: screening and theory-based outcomes from a randomized trial. Health Educ Behav (2013) 40(4):458-68. https://doi.org/10.1177/1090198112459651
Holt et al., 2017	Disease Prevention & Promotion	community health advisors	1	African Americans	0	0	0	1	1	1	0	0	0	3	1	Trained but not in core competencies	Holt CL, Le D, Slade JL, Muwwakkil B, Saunders DR, Williams R, Atkinson NL, Naslund M. Can Women Facilitate Men’s Prostate Cancer Screening Informed Decision-Making? The M-PACT Trial. J Health Commun (2017) 22(12):964-73. https://doi.org/10.1080/10810730.2017.1382616
Hughes et al., 2016	Chronic disease	CHW	0	Latinos and African Americans with type 2 diabetes	0	0	0	1	1	0	0	0	0	2	0	Information on training not provided	Hughes MM, Yang E, Ramanathan D, Benjamins MR. Community-based diabetes community health worker intervention in an underserved Chicago population. J Community Health(2016) 41(6):1249-56. https://doi.org/10.1007/s10900-016-0212-8
Ilangoven et al., 2016	Disease Prevention & Promotion	CHW	1	Haitian and Latina women in Little Haiti (Miami)	0	0	0	1	1	1	0	0	0	3	0	Experienced CHWs	Ilangovan K, Kobetz E, Koru-Sengul T, Marcus EN, Rodriguez B, Alonzo Y, Carrasquillo O. Acceptability and feasibility of human papilloma virus self-sampling for cervical cancer screening. J Womens Health (2016) 25(9):944-51. https://doi.org/10.1089/jwh.2015.5469
Ingram et al., 2012	Disease Prevention & Promotion	promotoras	1	Mexican-American moms in the border region	1	1	1	1	1	1	0	1	1	8	0	Experienced CHWs	Ingram M, Piper R, Kunz S, Navarro C, Sander A, Gastelum S. Salud Si: A case study for the use of participatory evaluation in creating effective and sustainable community-based health promotion. Fam Community Health (2012) 35(2):130-8. https://doi.org/10.1097/fch.0b013e31824650ed
Ingram et al., 2014	Disease Prevention & Promotion	promotoras	1	Latinos in the border region	1	1	1	0	1	1	0	1	1	7	0	Experienced CHWs	Ingram M, Schachter KA, Sabo SJ, Reinschmidt KM, Gomez S, De Zapien JG, Carvajal SC. A community health worker intervention to address the social determinants of health through policy change. J Prim Prev (2014) 35(2):119-23. https://doi.org/10.1007/s10935-013-0335-y
Islam et al., 2013	Chronic disease	CHW	1	Bangladeshi adults with type 2 diabetes	1	1	1	1	1	1	0	0	0	6	0	Trained but not in core competencies	Islam NS, Wyatt LC, Patel SD, Shapiro E, Tandon SD, Mukherji BR, Tanner M, Rey MJ, Trinh-Shevrin C. Evaluation of a community health worker pilot intervention to improve diabetes management in Bangladeshi immigrants with type 2 diabetes in New York City. Diabetes Educ (2013) 39(4):478-93. https://doi.org/10.1177/0145721713491438
Islam et al., 2013	Disease Prevention & Promotion	CHW	1	Korean adults at risk for diabetes	0	1	1	1	1	1	0	1	0	6	1	Trained in core competencies	Islam NS, Zanowiak JM, Wyatt LC, Chun K, Lee L, Kwon SC, Trinh-Shevrin C. A randomized-controlled, pilot intervention on diabetes prevention and healthy lifestyles in the New York City Korean community. J Community Health (2013) 38(6):1030-41. https://doi.org/10.1007/s10900-013-9711-z
Islam et al., 2014	Disease Prevention & Promotion	CHW	1	Sikh adults at risk for diabetes	0	1	1	1	1	1	0	1	1	7	1	Trained in core competencies	Islam NS, Zanowiak JM, Wyatt LC, Kavathe R, Singh H, Kwon SC, Trinh-Shevrin C. Diabetes prevention in the New York City Sikh Asian Indian community: a pilot study. Int J Environ Res Public Health (2014) 11(5):5462-86. https://doi.org/10.3390/ijerph110505462
Johnson et al,. 2015	Chronic disease	CHW	0	African Americans with uncontrolled hypertension	0	0	0	1	1	1	0	0	0	3	1	Experienced CHWs	Johnson W, Ezeugwu C, Monroe D, Breunig IM, Shaya F. A Pilot Study Evaluating a Community-Based Intervention Focused on the ISHIB IMPACT Cardiovascular Risk Reduction Toolkit in African American Patients with Uncontrolled Hypertension. Ethn Dis (2015) 25(2):162-7.
Juon et al., 2016	Disease Prevention & Promotion	lay health workers	0	Foreign-born Asian Americans	0	0	0	1	1	0	0	0	0	2	1	Trained but not in core competencies	Juon HS, Strong C, Kim F, Park E, Lee S. Lay health worker intervention improved compliance with hepatitis B vaccination in Asian Americans: randomized controlled trial. PloS one. (2016) 11(9):1-14. https://doi.org/10.1371/journal.pone.0162683
Kaphingst et al., 2011	Disease Prevention & Promotion	lay health advisors	0	Latino adults	0	1	0	1	1	1	0	0	0	4	0	Experienced CHWs	Kaphingst KA, Lachance CR, Gepp A, D’Anna LH, Rios-Ellis B. Educating underserved Latino communities about family health history using lay health advisors. Public health genomics. (2011) 14:211-21. https://doi.org/10.1159/000272456
Katula et al., 2013	Disease Prevention & Promotion	CHW	0	Adults with prediabetes	0	0	0	0	1	1	0	0	0	2	1	Trained but not in core competencies	Katula JA, Vitolins MZ, Morgan TM, Lawlor MS, Blackwell CS, Isom SP, Pedley CF, Goff Jr DC. The Healthy Living Partnerships to Prevent Diabetes study: 2-year outcomes of a randomized controlled trial. Am J Prev Med (2013) 44(4):S324-32. doi: 10.1016/j.amepre.2012.12.015
Kieffer et al., 2013	Maternal & Child Health	women's health advocates/community heath workers	1	Pregnant Latina women	0	0	0	1	1	0	0	0	0	2	1	Information on training not provided	Kieffer EC, Caldwell CH, Welmerink DB, Welch KB, Sinco BR, Guzmán JR. Effect of the healthy MOMs lifestyle intervention on reducing depressive symptoms among pregnant Latinas. Am J Community Psychol (2013) 51(1-2):76-89. https://doi.org/10.1007/s10464-012-9523-9
Kieffer et al., 2014	Maternal & Child Health	CHW	1	Pregnant Latina women	0	0	0	0	1	0	0	0	0	1	1	Experienced CHWs	Kieffer EC, Welmerink DB, Sinco BR, Welch KB, Rees Clayton EM, Schumann CY, Uhley VE. Dietary outcomes in a Spanish-language randomized controlled diabetes prevention trial with pregnant Latinas. Am J Public Health (2014) 104(3):526-33. https://doi.org/10.2105/ajph.2012.301122
Kim et al., 2015	Chronic disease	CHW	1	Korean-Americans with type 2 diabetes	0	0	0	1	1	0	0	0	0	2	1	Experienced CHWs	Kim MT, Kim KB, Huh B, Nguyen T, Han HR, Bone LR, Levine D. The effect of a community-based self-help intervention: Korean Americans with type 2 diabetes. Am J Prev Med (2015) 49(5):726-37. http://dx.doi.org/10.1016/j.amepre.2015.04.033
Koniak-Griffin et al., 2015	Disease Prevention & Promotion	promotoras	1	Overweight, immigrant Latina women	0	0	0	0	1	0	0	0	0	1	1	Experienced CHWs	Koniak-Griffin D, Brecht ML, Takayanagi S, Villegas J, Melendrez M, Balcázar H. A community health worker-led lifestyle behavior intervention for Latina (Hispanic) women: Feasibility and outcomes of a randomized controlled trial. Int J Nurs Stud (2015) 52(1):75-87. http://dx.doi.org/10.1016/j.ijnurstu.2014.09.005
Krantz et al., 2017	Disease Prevention & Promotion	CHW	0	Latino adults at risk for cardiovascular disease	0	0	0	0	1	0	0	0	0	1	0	Information on training not provided	Krantz MJ, Beaty B, Coronel-Mockler S, Leeman-Castillo B, Fletcher K, Estacio RO. Reduction in cardiovascular risk among Latino participants in a community-based intervention linked with clinical care. Am J Prev Med (2017) 53(2):e71-5. https://doi.org/10.1016/j.amepre.2017.04.012
Kutcher et al., 2015	Disease Prevention & Promotion	CHW	1	Hispanic communities	1	1	0	1	1	1	1	1	1	8	0	Experienced CHWs	Kutcher R, Moore-Monroy M, Bello E, Doyle S, Ibarra J, Kunz S, Munoz R, Patton-Lopez M, Sharkey JR, Wilger S, Alfero C. Promotores as advocates for community improvement: Experiences of the western states REACH Su Comunidad Consortium. J Ambul Care Manage (2015) 38(4):321-32. https://doi.org/10.1097/jac.0000000000000073
Lachance et al., 2018	Disease Prevention & Promotion	CHW	0	African American women	0	0	0	0	1	0	0	0	0	1	0	Information on training not provided	Lachance L, Kelly RP, Wilkin M, Burke J, Waddell S. Community-based efforts to prevent and manage diabetes in women living in vulnerable communities. J Community Health (2018) 43(3):508-17. https://doi.org/10.1007/s10900-017-0444-2
Larkey et al., 2012	Disease Prevention & Promotion	promotoras	1	Latina women	0	1	1	1	1	0	0	0	0	4	1	Experienced CHWs	Larkey LK, Herman PM, Roe DJ, Garcia F, Lopez AM, Gonzalez J, Perera PN, Saboda K. A cancer screening intervention for underserved Latina women by lay educators. J Womens Health (2012) 21(5):557-66. https://doi.org/10.1089/jwh.2011.3087
Lin et al., 2017	Chronic disease	CHW	0	Frequent emergency department users	0	0	0	0	1	0	0	0	0	1	1	Information on training not provided	Lin MP, Blanchfield BB, Kakoza RM, Vaidya V, Price C, Goldner JS, Schuur JD. ED-based care coordination reduces costs for frequent ED users. Am J Manag Care (2017) 23(12):762-6.
Lopez et al., 2017	Chronic disease	CHW	1	Housing developments with high chronic disease burden	0	0	0	0	1	1	0	0	0	2	0	Trained in core competencies	Lopez PM, Islam N, Feinberg A, Myers C, Seidl L, Drackett E, Riley L, Mata A, Pinzon J, Benjamin E, Wyka K. A place-based community health worker program: feasibility and early outcomes, New York City, 2015. Am J Prev Med (2017) 52(3):S284-9. https://doi.org/10.1016/j.amepre.2016.08.034
Lynch et al., 2014	Chronic disease	CHW	0	African Americans with comorbid hypertension and diabetes	0	0	0	0	1	0	0	0	0	1	1	Information on training not provided	Lynch EB, Liebman R, Ventrelle J, Avery EF, Richardson D. Peer reviewed: A self-management intervention for African Americans with comorbid diabetes and hypertension: A pilot randomized controlled trial. Prev Chronic Dis (2014) 11:130349. http://dx.doi.org/10.5888/pcd11.130349
Marín et al., 2009	Environmental & Occupational Health	promotoras	1	Latino poultry workers	0	0	0	1	1	1	0	1	1	5	0	Trained in core competencies	Marín A, Carrillo L, Arcury TA, Grzywacz JG, Coates ML, Quandt SA. Ethnographic evaluation of a lay health promoter program to reduce occupational injuries among Latino poultry processing workers. Public Health Reports. (2009) 124(4_suppl1):36-43
Marrone et al., 2017	Chronic disease	CHW	1	Latino adults with hearing loss	0	1	1	1	1	1	0	1	0	6	0	Experienced CHWs	Marrone N, Ingram M, Somoza M, Jacob DS, Sanchez A, Adamovich S, et al. Interventional audiology to address hearing health care disparities: Oyendo Bien pilot study. Semin Hear (2017) 38(02): 198-211. doi: 10.1055/s-0037-1601575
Martin et al., 2009	Chronic disease	CHW	0	African American adults with asthma	0	1	0	0	1	0	0	0	0	2	1	Trained but not in core competencies	Martin MA, Catrambone CD, Kee RA, Evans AT, Sharp LK, Lyttle C, Rucker-Whitaker C, Weiss KB, Shannon JJ, Chicago Initiative to Raise Asthma Health Equity Investigative Team. Improving asthma self-efficacy: developing and testing a pilot community-based asthma intervention for African American adults. J Allergy Clin Immunol Pract (2009) 123(1):153-9. https://doi.org/10.1016/j.jaci.2008.10.057
Martin et al., 2011	Chronic disease	CHW	0	Hypertensive adults in rural Alabama	0	0	0	0	1	1	0	0	0	2	1	Trained but not in core competencies	Martin MY, Kim YI, Kratt P, Litaker MS, Kohler CL, Schoenberger YM, Clarke SJ, Prayor-Patterson H, Tseng TS, Pisu M, Dale Williams O. Medication adherence among rural, low-income hypertensive adults: a randomized trial of a multimedia community-based intervention. Am J Health Promot (2011) 25(6):372-8. https://doi.org/10.4278/ajhp.090123-quan-26
Martin et al., 2015	Chronic disease	CHW	1	Puerto Rican children with asthma	0	0	0	0	1	0	0	0	0	1	1	Trained but not in core competencies	Martin MA, Mosnaim GS, Olson D, Swider S, Karavolos K, Rothschild S. Results from a community-based trial testing a community health worker asthma intervention in Puerto Rican youth in Chicago. J Asthma (2015) 52(1):59-70. https://doi.org/10.3109/02770903.2014.950426
Martin et al., 2016	Chronic disease	CHW	1	Children with comorbid asthma and obesity	0	0	0	0	1	0	0	0	0	1	0	Trained but not in core competencies	Martin MA, Rothschild SK, Lynch E, Christoffel KK, Pagán MM, Rodriguez JL, Barnes A, Karavolos K, Diaz A, Hoffman LM, Plata D. Addressing asthma and obesity in children with community health workers: proof-of-concept intervention development. BMC Pediatr (2016) 16(1):198. https://doi.org/10.1186/s12887-016-0745-0
McCloskey et al., 2011	Chronic disease	promotores	1	Hispanic adults with diabetes	0	0	0	0	1	1	0	0	0	2	0	Trained in core competencies	McCloskey J, Tollestrup K, Sanders M. A community integration approach to social determinants of health in New Mexico. Fam Community Health (2011) 34:S79-91. https://doi.org/10.1097/fch.0b013e318202a852
McDonough et al., 2016	Disease Prevention & Promotion	promotores	1	Latina women	0	1	0	1	1	1	0	0	0	4	0	Experienced CHWs	McDonough AM, Vargas M, Nguyen-Rodriguez S, Garcia M, Galvez G, Rios-Ellis B. Mujer sana, familia fuerte: The effects of a culturally-relevant, community-based, promotores program to increase cervical cancer screening among Latinas. J Health Care Poor Underserved. (2016) 27(2):568-79. https://doi.org/10.1353/hpu.2016.0094
Messias et al., 2013	Disease Prevention & Promotion	promotoras	1	Mexican-origin women	0	1	1	1	1	1	0	0	0	5	1	Trained in core competencies	Messias DK, Parra-Medina D, Sharpe PA, Treviño L, Koskan AM, Morales-Campos D. Promotoras de Salud: roles, responsibilities, and contributions in a multi-site community-based randomized controlled trial. Hisp Health Care Int (2013) 11(2):62-71. https://doi.org/10.1891/1540-4153.11.2.62
Michael et al., 2008	Disease Prevention & Promotion	CHW	1	Latino and African American adults	1	1	1	1	1	0	0	1	1	7	0	Trained in core competencies	Michael YL, Farquhar SA, Wiggins N, Green MK. Findings from a community-based participatory prevention research intervention designed to increase social capital in Latino and African American communities. J Immigr Minor Health (2008) 10(3):281-9. https://doi.org/10.1007/s10903-007-9078-2
Minkler et al., 2010	Environmental & Occupational Health	promotoras	1	Residents of Old Town National City	1	0	1	1	1	1	0	1	1	7	0	Experienced CHWs	Minkler M, Garcia AP, Williams J, LoPresti T, Lilly J. Si se puede: using participatory research to promote environmental justice in a Latino community in San Diego, California. J Urban Health (2010) 87(5):796-812. https://doi.org/10.1007/s11524-010-9490-0
Monaghan et al., 2011	Environmental & Occupational Health	CHWs	1	Migrant citrus harvesters	0	0	0	1	1	1	0	0	0	3	0	Experienced CHWs	Monaghan PF, Forst LS, Tovar-Aguilar JA, Bryant CA, Israel GD, Galindo-Gonzalez S, Thompson Z, Zhu Y, McDermott RJ. Preventing eye injuries among citrus harvesters: the community health worker model. Am J Public Health (2011) 101(12):2269-74. https://doi.org/10.2105/ajph.2011.300316
Moore et al., 2016	Substance Use	promotoras	1	Latino day laborers	1	1	1	1	1	0	0	0	0	5	1	Experienced CHWs	Moore AA, Karno MP, Ray L, Ramirez K, Barenstein V, Portillo MJ, et al. Development and preliminary testing of a promotora-delivered, Spanish language, counseling intervention for heavy drinking among male, Latino day laborers. J Subst Abuse Treat (2016) 62:96-101. https://doi.org/10.1016/j.jsat.2015.11.003
Mundorf et al., 2018	Maternal & Child Health	CHW	0	African American women of Gulf Coast region	0	0	0	0	1	0	0	0	0	1	0	Trained but not in core competencies	Mundorf C, Shankar A, Moran T, Heller S, Hassan A, Harville E, Lichtveld M. Reducing the risk of postpartum depression in a low-income community through a community health worker intervention. Matern Child Health J (2018) 22(4):520-8. https://doi.org/10.1007/s10995-017-2419-4
Nelson et al., 2017	Chronic disease	CHW	0	Low-income adults with diabetes	0	0	0	0	1	1	0	0	0	2	1	Trained but not in core competencies	Nelson K, Taylor L, Silverman J, Kiefer M, Hebert P, Lessler D, Krieger J. Randomized Controlled Trial of a Community Health Worker Self-Management Support Intervention Among Low-Income Adults With Diabetes, Seattle, Washington, 2010-2014. Prev Chronic Dis(2017) 14:E15. https://doi.org/10.5888/pcd14.160344
Nguyen et al., 2010	Disease Prevention & Promotion	lay health workers	1	Chinese Americans	0	0	0	1	1	0	0	0	0	2	0	Experienced CHWs	Nguyen TT, Love MB, Liang C, Fung LC, Nguyen T, Wong C, Gildengorin G, Woo K. A pilot study of lay health worker outreach and colorectal cancer screening among Chinese Americans. J Cancer Educ (2010) 25(3):405-12.https://doi.org/10.1007/s13187-010-0064-3
Nicolaidis et al., 2013	Mental health	promotoras	1	Latina IPV survivors	1	1	1	1	1	0	0	1	1	7	0	Experienced CHWs	Nicolaidis C, Mejia A, Perez M, Alvarado A, Celaya-Alston R, Quintero Y, Aguillon R. Proyecto Interconexiones: pilot-test of a community-based depression care program for Latina violence survivors. Prog Community Health Partnersh (2013) 7(4):395-401. https://doi.org/10.1353/cpr.2013.0051
O'brien et al., 2017	Disease Prevention & Promotion	promotoras	0	Latinas with prediabetes	0	0	0	0	1	1	0	0	0	2	1	Experienced CHWs	O’Brien MJ, Perez A, Scanlan AB, Alos VA, Whitaker RC, Foster GD, Ackermann RT, Ciolino JD, Homko C. PREVENT-DM comparative effectiveness trial of lifestyle intervention and metformin. Am J Prev Med (2017) 52(6):788-97. https://doi.org/10.1016/j.amepre.2017.01.008
Palmas et al., 2014	Chronic disease	CHW	1	Hispanic adults with diabetes	0	0	0	0	1	0	0	0	0	1	1	Trained but not in core competencies	Palmas W, Findley SE, Mejia M, Batista M, Teresi J, Kong J, Silver S, Fleck EM, Luchsinger JA, Carrasquillo O. Results of the northern Manhattan diabetes community outreach project: a randomized trial studying a community health worker intervention to improve diabetes care in Hispanic adults. Diabetes Care (2014) 37(4):963-9. https://doi.org/10.2337/dc13-2142
Parker et al., 2008	Chronic disease	CHW	1	Children with asthma symptoms symptoms	0	0	0	0	1	0	0	0	0	1	1	Trained in core competencies	Parker EA, Israel BA, Robins TG, Mentz G, Lin X, Brakefield-Caldwell W, Ramirez E, Edgren KK, Salinas M, Lewis TC. Evaluation of Community Action Against Asthma: a community health worker intervention to improve children's asthma-related health by reducing household environmental triggers for asthma. Health Educ Behav (2008) 35(3):376-95. https://doi.org/10.1177/1090198106290622
Peretz et al., 2012	Chronic disease	CHW	1	Latino children with asthma	0	0	0	1	1	1	0	0	0	3	0	Trained in core competencies	Peretz PJ, Matiz LA, Findley S, Lizardo M, Evans D, McCord M. Community health workers as drivers of a successful community-based disease management initiative. Am J Public Health (2012) 102(8):1443-6. https://doi.org/10.2105/ajph.2011.300585
Plescia et al., 2008	Disease Prevention & Promotion	lay health advisors	1	African American community in North Carolina	0	0	0	0	1	0	0	0	1	2	0	Trained but not in core competencies	Plescia M, Herrick H, Chavis L. Improving health behaviors in an African American community: the Charlotte Racial and Ethnic Approaches to Community Health project. Am J Public Health (2008) 98(9):1678-84. https://doi.org/10.2105/ajph.2007.125062
Pratt et al., 2017	Mental health	CHW	0	Somali immigrant women	0	0	0	1	1	0	0	0	0	2	0	Trained but not in core competencies	Pratt R, Ahmed N, Noor S, Sharif H, Raymond N, Williams C. Addressing behavioral health disparities for Somali immigrants through group cognitive behavioral therapy led by community health workers. J Immigr Minor Health (2017) 19(1):187-93. https://doi.org/10.1007/s10903-015-0338-2
Preston et al., 2018	Disease Prevention & Promotion	community lay health workers	1	Rural, poor adults in Arkansas communities	0	0	0	0	1	0	0	0	0	1	1	Experienced CHWs	Preston MA, Glover-Collins K, Ross L, Porter A, Bursac Z, Woods D, Burton J, Crowell K, Laryea J, Henry-Tillman RS. Colorectal cancer screening in rural and poor-resourced communities. Am J Surg (2018) 216(2):245-50. https://doi.org/10.1016/j.amjsurg.2017.08.004
Quandt et al., 2013	Environmental & Occupational Health	promotores	1	Family members of migrant farmworkers	0	0	0	1	1	0	0	0	0	2	0	Experienced CHWs	Quandt SA, Grzywacz JG, Talton JW, Trejo G, Tapia J, D’Agostino Jr RB, Mirabelli MC, Arcury TA. Evaluating the effectiveness of a lay health promoter-led, community-based participatory pesticide safety intervention with farmworker families. Health Promot Pract (2013) 14(3):425-32. https://doi.org/10.1177/1524839912459652
Ramos et al., 2009	Disease Prevention & Promotion	promotoras/animadoras	0	Latinas in the border region at risk for HIV	0	1	0	1	1	1	0	0	0	4	0	Trained in core competencies	Ramos RL, Green NL, Shulman LC. Pasa la Voz: using peer driven interventions to increase Latinas' access to and utilization of HIV prevention and testing services. J Health Care Poor Underserved (2009) 20(1):29-35. https://doi.org/10.1353/hpu.0.0124
Reifsnider et al., 2018	Maternal & Child Health	promotoras	1	Pregnant, obese Latina women	0	0	0	0	1	0	0	0	0	1	1	Trained in core competencies	Reifsnider E, McCormick DP, Cullen KW, Todd M, Moramarco MW, Gallagher MR, Reyna L. Randomized controlled trial to prevent infant overweight in a high-risk population. Acad Pediatr (2018) 18(3):324-33. https://doi.org/10.1016/j.acap.2017.12.007
Rhodes et al., 2009	Disease Prevention & Promotion	lay health advisers	1	Latino men	0	0	0	0	1	0	0	0	1	2	0	Trained in core competencies	Rhodes SD, Hergenrather KC, Bloom FR, Leichliter JS, Montaño J. Outcomes from a community-based, participatory lay health adviser HIV/STD prevention intervention for recently arrived immigrant Latino men in rural North Carolina. AIDS Educ Prev (2009) 21(Supplement B):103-8. https://doi.org/10.1521/aeap.2009.21.5_supp.103
Rios-Ellis et al., 2015	Disease Prevention & Promotion	promotores	1	Latinos	0	1	1	1	1	0	0	0	0	4	0	Trained in core competencies	Rios-Ellis B, Becker D, Espinoza L, Nguyen-Rodriguez S, Diaz G, Carricchi A, et al. Evaluation of a community health worker intervention to reduce HIV/AIDS stigma and increase HIV testing among underserved Latinos in the Southwestern US. Public Health Rep (2015) 130(5):458-67. https://doi.org/10.1177/003335491513000509
Rios-Ellis et al., 2015	Maternal & Child Health	promotores	1	Latina mothers	0	1	1	1	1	1	0	0	0	5	0	Trained but not in core competencies	Rios-Ellis B, Nguyen-Rodriguez ST, Espinoza L, Galvez G, Garcia-Vega M. Engaging community with promotores de salud to support infant nutrition and breastfeeding among Latinas residing in Los Angeles County: Salud con Hyland's. Health Care Women Int (2015) 36(6):711-29. https://doi.org/10.1080/07399332.2014.900060
Rios-Ellis et al., 2010	Disease Prevention & Promotion	CHW	1	Latino families	0	1	1	1	1	1	0	0	0	5	0	Trained in core competencies	Rios-Ellis B, Espinoza L, Bird M, Garcia M, D'Anna LH, Bellamy L, Scolari R. Increasing HIV-related knowledge, communication, and testing intentions among Latinos: Protege tu Familia: Hazte la Prueba. J Health Care Poor Underserved (2010) 21(3):148-68. https://doi.org/10.1353/hpu.0.0360
Rodgers et al., 2017	Mental health	CHW	0	Women experiencing intimate partner violence	0	0	0	0	1	1	0	0	0	2	1	Experienced CHWs	Rodgers MA, Grisso JA, Crits-Christoph P, Rhodes KV. No quick fixes: A mixed methods feasibility study of an urban community health worker outreach program for intimate partner violence. Violence Against Women. (2017) 23(3):287-308. https://doi.org/10.1177/1077801216640383
Rorie et al., 2011	Disease Prevention & Promotion	resident health advocates	1	Residents of Boston public housing	0	0	0	1	1	0	0	0	0	2	0	Experienced CHWs	Rorie JA, Smith A, Evans T, Horsburgh JC, Brooks DR, Goodman R, Bunte D, Strunin L, Geller A. Using resident health advocates to improve public health screening and follow-up among public housing residents, Boston, 2007-2008. Prev Chronic Dis (2011) Jan;8(1):A15-.
Rosas et al., 2015	Disease Prevention & Promotion	CHW	0	Latinos with obesity	0	0	0	0	1	0	0	0	0	1	1	Trained in core competencies	Rosas LG, Thiyagarajan S, Goldstein BA, Drieling RL, Romero PP, Ma J, Yank V, Stafford RS. The effectiveness of two community-based weight loss strategies among obese, low-income US Latinos. J Acad Nutr Diet(2015) 115(4):537-50. https://doi.org/10.1016/j.jand.2014.10.020
Rothschild et al., 2014	Chronic disease	CHW	0	Mexican-Americans with type 2 diabetes	0	0	0	1	1	1	0	0	0	3	1	Experienced CHWs	Rothschild SK, Martin MA, Swider SM, Tumialán Lynas CM, Janssen I, Avery EF, Powell LH. Mexican American trial of community health workers: a randomized controlled trial of a community health worker intervention for Mexican Americans with type 2 diabetes mellitus. Am J Public Health (2014) 104(8):1540-8. https://doi.org/10.2105/ajph.2013.301439
Ruggiero et al., 2011	Disease Prevention & Promotion	CHW	1	Latinos at risk for diabetes	0	0	0	0	1	0	0	0	0	1	0	Trained but not in core competencies	Ruggiero L, Oros S, Choi YK. Community-based translation of the diabetes prevention program’s lifestyle intervention in an underserved Latino population. Diabetes Educ (2011) 37(4):564-72. https://doi.org/10.1177/0145721711411107
Salvatore et al., 2015	Environmental & Occupational Health	CHW	1	Children of farmworkers	0	0	0	0	1	0	0	0	0	1	1	Trained in core competencies	Salvatore AL, Castorina R, Camacho J, Morga N, López J, Nishioka M, Barr DB, Eskenazi B, Bradman A. Home-based community health worker intervention to reduce pesticide exposures to farmworkers’ children: A randomized-controlled trial. J Expo Sci Environ Epidemiol (2015) 25(6):608-15. https://doi.org/10.1038/jes.2015.39
Niemiec et al., 2018	Disease Prevention & Promotion	CHW	1	Latino adults	0	0	0	0	1	0	0	0	0	1	0	Trained in core competencies	Niemiec SL, Blanchard J, Vigen CL, Martínez J, Guzmán L, Concha A, Fluke M, Carlson M. Evaluation of¡ Vivir Mi Vida! to improve health and wellness of rural-dwelling, late middle-aged Latino adults: results of a feasibility and pilot study of a lifestyle intervention. Prim Health Care Res Dev (2018) 19(5):448-63. https://doi.org/10.1017/s1463423617000901
Schoenberg et al., 2016	Substance Use	lay health advisors	1	Smokers in Appalachian Kentucky	0	0	0	0	1	0	0	0	0	1	1	Trained but not in core competencies	Schoenberg NE, Studts CR, Shelton BJ, Liu M, Clayton R, Bispo JB, Fields N, Dignan M, Cooper T. A randomized controlled trial of a faith-placed, lay health advisor delivered smoking cessation intervention for rural residents. Prev Med Rep (2016) 3:317-23. https://doi.org/10.1016/j.pmedr.2016.03.006
Schwartz et al., 2013	Disease Prevention & Promotion	promotores	1	Hispanic families in Southwest Idaho	1	1	0	1	1	1	0	0	0	5	0	Trained but not in core competencies	Schwartz R, Powell L, Keifer M. Family-based risk reduction of obesity and metabolic syndrome: An overview and outcomes of the Idaho partnership for hispanic health. J Health Care Poor Underserved(2013) 24(2):129-44. https://doi.org/10.1353/hpu.2013.0106
Shaibi et al., 2012	Disease Prevention & Promotion	promotoras	1	Obese Latino adolescents	0	0	0	0	1	0	0	0	0	1	0	Information on training not provided	Shaibi GQ, Konopken Y, Hoppin E, Keller CS, Ortega R, Castro FG. Effects of a culturally grounded community-based diabetes prevention program for obese Latino adolescents. Diabetes Educ (2012) 38(4):504-12. https://doi.org/10.1177/0145721712446635
Shokar et al., 2016	Disease Prevention & Promotion	promotoras	0	Uninsured	0	0	0	1	1	1	0	0	0	3	1	Information on training not provided	Shokar NK, Byrd T, Salaiz R, Flores S, Chaparro M, Calderon-Mora J, Reininger B, Dwivedi A. Against colorectal cancer in our neighborhoods (ACCION): A comprehensive community-wide colorectal cancer screening intervention for the uninsured in a predominantly Hispanic community. Prev Med (2016) 91:273-80. https://doi.org/10.1016/j.ypmed.2016.08.039
Simonsen et al., 2017	Disease Prevention & Promotion	CHW	1	Women of color	0	0	0	1	1	1	1	1	1	6	1	Trained but not in core competencies	Simonsen SE, Ralls B, Guymon A, Garrett T, Eisenman P, Villalta J, et al. Addressing Health Disparities from Within the Community: Community-Based Participatory Research and Community Health Worker Policy Initiatives Using a Gender-Based Approach. Women's Health Issues (2017) 27(S1):S46-53. https://doi.org/10.1016/j.whi.2017.09.006
Stanford et al., 2016	Disease Prevention & Promotion	CHW	0	Immigrants in Florida	0	0	0	1	1	1	0	0	0	3	0	Trained but not in core competencies	Stanford J, Biba A, Khubchandani J, Webb F, Rathore MH. Community-engaged strategies to promote hepatitis B testing and linkage to care in immigrants of Florida. J Epidemiol Glob Health (2016) 6(4):277-84. https://doi.org/10.1016/j.jegh.2016.06.003
Studts et al., 2012	Disease Prevention & Promotion	lay health advisors	0	Middle aged women in Appalachia	0	0	0	0	1	0	0	0	0	1	1	Trained in core competencies	Studts CR, Tarasenko YN, Schoenberg NE, Shelton BJ, Hatcher-Keller J, Dignan MB. A community-based randomized trial of a faith-placed intervention to reduce cervical cancer burden in Appalachia. Prev Med (2012) 54(6):408-14. https://doi.org/10.1016/j.ypmed.2012.03.019
Suarez et al., 2012	Substance Use	promotores	1	Latino smokers	1	1	0	1	1	1	0	1	0	6	0	Experienced CHWs	Suarez N, Mendoza I, Garrett S, Ellerbeck EF. Success of" Promotores de Salud" in identifying immigrant Latino smokers and developing quit plans. Int Public Health J (2012) 4(3):343-53.
Taylor et al., 2013	Disease Prevention & Promotion	lay health workers	0	Cambodian Americans	0	0	0	0	1	0	0	0	0	1	1	Trained in core competencies	Taylor VM, Bastani R, Burke N, Talbot J, Sos C, Liu Q, Do H, Jackson JC, Yasui Y. Evaluation of a hepatitis B lay health worker intervention for Cambodian Americans. J Community Health (2013) 38(3):546-53. https://doi.org/10.1007/s10900-012-9649-6
Thomas et al., 2014	Chronic disease	community health coaches	1	Adult hypertensives	0	0	0	1	1	0	0	0	0	2	0	Trained in core competencies	Thomas KL, Shah BR, Elliot-Bynum S, Thomas KD, Damon K, Allen LaPointe NM, Calhoun S, Thomas L, Breathett K, Mathews R, Anderson M. Check it, change it: a community-based, multifaceted intervention to improve blood pressure control. Circ Cardiovasc Qual Outcomes (2014) Nov;7(6):828-34. https://doi.org/10.1161/circoutcomes.114.001039
Thompson et al., 2017	Disease Prevention & Promotion	promotoras	1	Rural Latinas	0	1	0	0	1	0	0	0	0	2	1	Trained but not in core competencies	Thompson B, Carosso EA, Jhingan E, Wang L, Holte SE, Byrd TL, Benavides MC, Lopez C, Martinez‐Gutierrez J, Ibarra G, Gonzalez VJ. Results of a randomized controlled trial to increase cervical cancer screening among rural Latinas. Cancer (2017) 123(4):666-74. https://doi.org/10.1002/cncr.30399
Tran et al., 2014	Mental health	promotoras	1	Immigrant Latinas	0	1	0	1	1	1	0	0	0	4	0	Trained but not in core competencies	Tran AN, Ornelas IJ, Kim M, Perez G, Green M, Lyn MJ, Corbie-Smith G. Results from a pilot promotora program to reduce depression and stress among immigrant Latinas. Health Promot Pract (2014) 15(3):365-72. https://doi.org/10.1002/cncr.30399
Treadwell et al., 2010	Chronic disease	CHW	0	African American men	0	0	0	1	1	1	0	0	0	3	0	Trained but not in core competencies	Treadwell H, Holden K, Hubbard R, Harper F, Wright F, Ferrer M, Blanks SH, Villani G, Thomas A, Washington F, Kim EK. Addressing obesity and diabetes among African American men: examination of a community-based model of prevention. J Natl Med Assoc (2010) 102(9):794-802. https://doi.org/10.1016/s0027-9684(15)30676-3
Tully et al., 2015	Chronic disease	CHW	1	African American men with hypertension	0	0	0	1	1	0	0	0	0	2	0	Experienced CHWs	Tully M, Kos A, Eastwood D, Kusch J, Kotchen T. Implementation of an adjunct strategy to reduce blood pressure in blacks with uncontrolled hypertension: a pilot project. Ethn Dis (2015) 25(2):168-74.
Turner et al., 2018	Chronic disease	CHW	1	Low-income Hispanics with pain	0	0	0	1	1	1	0	0	0	3	1	Experienced CHWs	Turner BJ, Liang Y, Simmonds MJ, Rodriguez N, Bobadilla R, Yin Z. Randomized trial of chronic pain self-management program in the community or clinic for low-income primary care patients. J Gen Intern Med (2018) 33(5):668-77. https://doi.org/10.1007/s11606-017-4244-2
Ursua et al., 2018	Chronic disease	CHW	1	Filipino Americans with hypertension	0	0	0	1	1	1	0	0	0	3	1	Trained in core competencies	Ursua RA, Aguilar DE, Wyatt LC, Trinh-Shevrin C, Gamboa L, Valdellon P, Perrella EG, Dimaporo MZ, Nur PQ, Tandon SD, Islam NS. A community health worker intervention to improve blood pressure among Filipino Americans with hypertension: A randomized controlled trial. Prev Med Rep (2018) 11:42-8. https://doi.org/10.1016/j.pmedr.2018.05.002
Valen et al., 2012	Chronic disease	CHW	0	Hispanics with type 2 diabetes	0	1	0	0	1	0	0	0	0	2	0	Experienced CHWs	Valen MS, Narayan S, Wedeking L. An innovative approach to diabetes education for a Hispanic population utilizing community health workers. J Cult Divers (2012) 19(1): 10-7.
Vincent et al., 2014	Chronic disease	promotores	0	Mexican origin adults at risk for diabetes	0	0	0	1	1	0	0	0	0	2	1	Experienced CHWs	Vincent D, McEwen MM, Hepworth JT, Stump CS. The effects of a community-based, culturally tailored diabetes prevention intervention for high-risk adults of Mexican descent. Diabetes Educ (2014) 40(2):202-13. https://doi.org/10.1177/0145721714521020
Wang et al., 2012	Disease Prevention & Promotion	CHW	1	Recently incarcerated individuals	0	0	0	0	1	0	0	0	0	1	1	Experienced CHWs	Wang EA, Hong CS, Shavit S, Sanders R, Kessell E, Kushel MB. Engaging individuals recently released from prison into primary care: a randomized trial. Am J Public Health (2012) 102(9):e22-9. https://doi.org/10.2105/ajph.2012.300894
Wewers et al., 2017	Substance Use	CHW	0	Smokers in Appalachian counties	0	0	0	1	1	0	0	0	0	2	1	Trained but not in core competencies	Wewers ME, Shoben A, Conroy S, Curry E, Ferketich AK, Murray DM, Nemeth J, Wermert A. Effectiveness of two community health worker models of tobacco dependence treatment among community residents of Ohio Appalachia. Nicotine Tob Res (2017) 19(12):1499-507. https://doi.org/10.1093/ntr/ntw265
Whitley et al., 2011	Disease Prevention & Promotion	CHW	0	Adults in Colorado	0	0	0	1	1	1	0	0	0	3	0	Trained in core competencies	Whitley EM, Main DS, McGloin J, Hanratty R. Reaching individuals at risk for cardiovascular disease through community outreach in Colorado. Prev Med (2011) 52(1):84-6. https://doi.org/10.1016/j.ypmed.2010.10.005
Williams et al., 2009	Disease Prevention & Promotion	CHW	1	African American women	0	0	0	1	1	1	0	0	0	3	0	Experienced CHWs	Williams KP, Mullan PB, Todem D. Moving from theory to practice: implementing the Kin KeeperSM Cancer Prevention Model. Health Educ Res (2009) 24(2):343-56. https://doi.org/10.1093/her/cyn026
Williams et al., 2011	Disease Prevention & Promotion	CHW	0	African American, Arab, and Latina women	0	0	0	1	1	1	0	0	0	3	0	Trained but not in core competencies	Williams KP, Mabiso A, Todem D, Hammad A, Hamade H, Hill-Ashford Y, Robinson-Lockett M, Palamisono G, Zambrana RE. Differences in Knowledge of Breast Cancer Screening Among African American, Arab American, and Latina Women. Prev Chronic Dis (2011) 8(1): A20. https://www.cdc.gov/pcd/issues/2011/jan/09_0185.htm
Zandee et al., 2013	Disease Prevention & Promotion	CHW	1	Residents of underserved urban neighborhood	0	0	0	1	1	1	0	0	0	3	0	Trained but not in core competencies	Zandee GL, Bossenbroek D, Slager D, Gordon B. Teams of community health workers and nursing students effect health promotion of underserved urban neighborhoods. Public Health Nurs (2013) 30(5):439-47. https://doi.org/10.1111/phn.12031
Total			79		14	36	19	75	128	64	3	16	14	2.83846	56
		KEY	1 = YES
			2 = NO
